# Supplementary material
Source: HighWire-hosted journal article supplement (https://www.canjsurg.ca/highwire/filestream/96756/field_highwire_adjunct_files/0/cjs-021212-1-at.pdf)
Supplement: cjs-021212-1-at.pdf [file cjs-021212-1-at.pdf]

**Appendix 1** to Gill R, Majumdar SR, Wang X, et al. Prioritization and willingness to pay for bariatric surgery: the patient perspective. *Can J Surg* 2014

DOI: 10.1503/cjs.021212

Copyright © 2014 The Author(s) or their employer(s). To receive this resource in an accessible format, please contact us at [cmajgroup@cmaj.ca](mailto:cmajgroup@cmaj.ca).

### **Patient Survey Examining Prioritization for Surgery**

Please answer the following questions. You may skip any question that you do not wish to answer.

#### *Survey*

1. Date of Birth      \_\_\_\_/\_\_\_\_/\_\_\_\_\_  
                                  dd    mm    yyyy

2. Sex

- a. Male
- b. Female

3. Weight (kg) or (lbs)

4. Height (cm) or (inches)

5. Current Highest Level of Education

- a. Completed post secondary
- b. Some post secondary
- c. Completed high school
- d. Some high school
- e. No high school
- f. Not answered

6. What is your best estimate of the total income, before taxes and deductions, of all household members from all sources in the past 12 months?

- a. < 15,000
- b. 15,000 – 29,999
- c. 30,000 – 49,999
- d. 50,000 – 79,999
- e. ≥ 80,000
- f. Not answered

6. Current Employment Status

- a. Employed full-time
- b. Employed part-time
- c. Employed casual/volunteer
- d. On Long-Term Disability
- e. On Short-Term Disability
- f. Homemaker full-time
- g. Unemployed
- h. Retired
- i. Other
- j. Not answered

7. Patient A is at home and is waiting to have the same obesity surgery procedure as you are. This patient has waited the same length of time, and has the exact same symptoms as you. The patient is also the same age as you and has the same medical problems. Please rank where you think Patient A should be on the waiting list compared to you. (circle one)

| <b>Very Far Behind You</b> | <b>Behind You</b> | <b>Same Place</b> | <b>Ahead of You</b> | <b>Very Far Ahead of You</b> |
|----------------------------|-------------------|-------------------|---------------------|------------------------------|
| 1                          | 2                 | 3                 | 4                   | 5                            |

8. Patient B is waiting to have the same obesity surgery procedure as you are and has recently been urgently admitted to the hospital because of an illness related to their obesity. This patient has waited the same length of time and is also the same age as you. Please rank where you think Patient B should be on the waiting list compared to you. (circle one)

| <b>Very Far Behind You</b> | <b>Behind You</b> | <b>Same Place</b> | <b>Ahead of You</b> | <b>Very Far Ahead of You</b> |
|----------------------------|-------------------|-------------------|---------------------|------------------------------|
| 1                          | 2                 | 3                 | 4                   | 5                            |

9. Patient C is at home and is waiting to have the same obesity surgery procedure as you are. This patient has waited the same length of time, and has the exact same symptoms as you. The patient is 60 years old and has the same medical problems as you. Please rank where you think Patient C should be on the waiting list compared to you. (circle one)

| <b>Very Far Behind You</b> | <b>Behind You</b> | <b>Same Place</b> | <b>Ahead of You</b> | <b>Very Far Ahead of You</b> |
|----------------------------|-------------------|-------------------|---------------------|------------------------------|
| 1                          | 2                 | 3                 | 4                   | 5                            |

10. Patient D is at home and is waiting to have the same obesity surgery procedure as you are. This patient has waited the same length of time, and has the exact same symptoms as you. The patient is 60 years old and has the same medical problems as you but has to use wheelchair to move around and receives home care support. Please rank where you think Patient D should be on the waiting list compared to you. (circle one)

| Very Far Behind You | Behind You | Same Place | Ahead of You | Very Far Ahead of You |
|---------------------|------------|------------|--------------|-----------------------|
| 1                   | 2          | 3          | 4            | 5                     |

11. Patient E is at home and is waiting to have the same obesity surgery procedure as you are. This patient has waited the same length of time, and has the exact same symptoms as you. The patient is 60 years old and has the same medical problems as you but is not able to get out of bed and lives in a nursing home. Please rank where you think Patient E should be on the waiting list compared to you. (circle one)

| Very Far Behind You | Behind You | Same Place | Ahead of You | Very Far Ahead of You |
|---------------------|------------|------------|--------------|-----------------------|
| 1                   | 2          | 3          | 4            | 5                     |

12. Patient F is at home and is waiting to have the same obesity surgery procedure as you are. This patient has waited the same length of time, and has the exact same symptoms as you. The patient is 20 years old and has the same medical problems as you. Please rank where you think Patient F should be on the waiting list compared to you. (circle one)

| Very Far Behind You | Behind You | Same Place | Ahead of You | Very Far Ahead of You |
|---------------------|------------|------------|--------------|-----------------------|
| 1                   | 2          | 3          | 4            | 5                     |

13. Patient G is at home and is waiting to have the same obesity surgery procedure as you are. This patient has waited the same length of time, and has the exact same symptoms as you. The patient is 20 years old and has the same medical problems as you but has 4 children and is the only one in the family that earns money. Please rank where you think Patient G should be on the waiting list compared to you. (circle one)

| Very Far Behind You | Behind You | Same Place | Ahead of You | Very Far Ahead of You |
|---------------------|------------|------------|--------------|-----------------------|
| 1                   | 2          | 3          | 4            | 5                     |

14. Patient H is at home and is waiting to have the same obesity surgery procedure as you are. This patient has waited the same length of time, and has the exact same symptoms as you. The patient is 20 years old and has the same medical problems as you, is not married and receives social assistance. Please rank where you think Patient H should be on the waiting list compared to you. (circle one)

|                            |                   |                   |                     |                              |
|----------------------------|-------------------|-------------------|---------------------|------------------------------|
| <b>Very Far Behind You</b> | <b>Behind You</b> | <b>Same Place</b> | <b>Ahead of You</b> | <b>Very Far Ahead of You</b> |
| 1                          | 2                 | 3                 | 4                   | 5                            |

15. Patient I is at home and is waiting to have the same obesity surgery procedure as you are. This patient has recently donated 5 million dollars to the hospital foundation. Please rank where you think Patient H should be on the waiting list compared to you. (circle one)

|                            |                   |                   |                     |                              |
|----------------------------|-------------------|-------------------|---------------------|------------------------------|
| <b>Very Far Behind You</b> | <b>Behind You</b> | <b>Same Place</b> | <b>Ahead of You</b> | <b>Very Far Ahead of You</b> |
| 1                          | 2                 | 3                 | 4                   | 5                            |

16. Please rate how you feel about these statements:

a. Patients who can afford to pay for obesity surgery should receive their obesity surgery faster than those who cannot afford to pay.

|                          |                 |                  |              |                      |
|--------------------------|-----------------|------------------|--------------|----------------------|
| <b>Strongly Disagree</b> | <b>Disagree</b> | <b>Uncertain</b> | <b>Agree</b> | <b>Stongly Agree</b> |
| 1                        | 2               | 3                | 4            | 5                    |

b. You would be willing to pay extra to avoid having to wait for your obesity surgery.

|                          |                 |                  |              |                      |
|--------------------------|-----------------|------------------|--------------|----------------------|
| <b>Strongly Disagree</b> | <b>Disagree</b> | <b>Uncertain</b> | <b>Agree</b> | <b>Stongly Agree</b> |
| 1                        | 2               | 3                | 4            | 5                    |

**Table S1. Subgroup analyses by respondent BMI, age and sex**

| Scenario* | BMI          |             |         | Age          |             |         | Sex         |             |         |
|-----------|--------------|-------------|---------|--------------|-------------|---------|-------------|-------------|---------|
|           | < 47.93 (50) |             | p value | < 45 yr (50) |             | p value | Female (75) |             | p value |
|           | Mean         | SD          |         | Mean         | SD          |         | Mean        | SD          |         |
| A1        | 2.00 ± 0.20  | 1.92 ± 0.28 | 0.10    | 1.96 ± 0.20  | 1.96 ± 0.29 | 0.96    | 1.97 ± 0.23 | 1.92 ± 0.28 | 0.33    |
| A2        | 2.68 ± 0.82  | 2.73 ± 0.89 | 0.51    | 2.65 ± 0.88  | 2.76 ± 0.83 | 0.53    | 2.74 ± 0.86 | 2.58 ± 0.83 | 0.28    |
| B1        | 1.86 ± 0.57  | 1.78 ± 0.74 | 0.50    | 1.60 ± 0.70  | 2.04 ± 0.54 | 0.001   | 1.79 ± 0.68 | 1.92 ± 0.58 | 0.45    |
| B2        | 2.22 ± 0.74  | 2.27 ± 0.86 | 0.84    | 1.96 ± 0.83  | 2.53 ± 0.65 | < 0.001 | 2.16 ± 0.79 | 2.50 ± 0.78 | 0.045   |
| B3        | 2.26 ± 0.94  | 2.35 ± 0.99 | 0.59    | 2.08 ± 1.08  | 2.53 ± 0.77 | 0.044   | 2.16 ± 0.97 | 2.75 ± 0.79 | 0.007   |
| C1        | 1.84 ± 0.47  | 1.67 ± 0.63 | 0.17    | 1.92 ± 0.44  | 1.59 ± 0.61 | 0.004   | 1.76 ± 0.57 | 1.75 ± 0.53 | 0.80    |
| C2        | 2.10 ± 0.68  | 2.15 ± 0.72 | 0.61    | 2.08 ± 0.49  | 2.17 ± 0.86 | 0.94    | 2.05 ± 0.70 | 2.35 ± 0.65 | 0.037   |
| C3        | 1.82 ± 0.56  | 1.73 ± 0.61 | 0.45    | 1.92 ± 0.49  | 1.63 ± 0.64 | 0.015   | 1.74 ± 0.60 | 1.88 ± 0.54 | 0.53    |
| D         | 1.66 ± 0.66  | 1.60 ± 0.71 | 0.71    | 1.61 ± 0.70  | 1.65 ± 0.66 | 0.79    | 1.61 ± 0.72 | 1.71 ± 0.55 | 0.77    |

A1 = exactly the same as the respondent; A2 = recently admitted to hospital with acute illness related to obesity; B1 = 60 years old; B2 = 60 years old, uses wheelchair, receives home care support; B3 = 60 years old, bed-ridden, living in nursing home; BMI = body mass index; C1 = 20 years old; C2 = 20 years old, married with 4 children and only income earner for family; C3 = 20 years old, unmarried, receives social assistance; D = donated \$5 million to the hospital foundation; SD = standard deviation.

\*Answer scale: 0 = very far behind you, 1 = a little bit behind you, 2 = your place, 3 = a little bit ahead of you, 4 = very far ahead of you.

**Table S2. Subgroup analysis by respondent education and income level**

| Scenario* | Education level          |                                    |          | Annual income         |                       |          |
|-----------|--------------------------|------------------------------------|----------|-----------------------|-----------------------|----------|
|           | Postsecondary,<br>n = 46 | Less than postsecondary,<br>n = 53 | p value† | < \$80,000,<br>n = 51 | ≥ \$80,000,<br>n = 38 | p value† |
|           | Mean ± SD                | Mean ± SD                          |          | Mean ± SD             | Mean ± SD             |          |
| A1        | 1.97 ± 0.15              | 1.94 ± 0.31                        | 0.46     | 1.94 ± 0.31           | 2.00 ± 0.00           | 0.35     |
| A2        | 2.74 ± 0.80              | 2.67 ± 0.90                        | 0.97     | 2.54 ± 1.05           | 2.89 ± 0.56           | 0.44     |
| B1        | 1.89 ± 0.60              | 1.75 ± 0.70                        | 0.27     | 1.80 ± 0.69           | 1.76 ± 0.68           | 0.28     |
| B2        | 2.30 ± 0.79              | 2.19 ± 0.81                        | 0.49     | 2.12 ± 0.86           | 2.34 ± 0.71           | 0.29     |
| B3        | 2.24 ± 0.99              | 2.36 ± 0.94                        | 0.56     | 2.27 ± 1.06           | 2.32 ± 0.87           | 0.98     |
| C1        | 1.80 ± 0.58              | 1.72 ± 0.53                        | 0.24     | 1.67 ± 0.59           | 1.95 ± 0.46           | 0.017    |
| C2        | 2.20 ± 0.72              | 2.06 ± 0.68                        | 0.34     | 2.06 ± 0.56           | 2.26 ± 0.76           | 0.24     |
| C3        | 1.83 ± 0.64              | 1.73 ± 0.53                        | 0.26     | 1.72 ± 0.64           | 1.95 ± 0.32           | 0.037    |
| D         | 1.63 ± 0.71              | 1.63 ± 0.66                        | 0.84     | 1.60 ± 0.67           | 1.74 ± 0.60           | 0.42     |

A1 = exactly the same as the respondent; A2 = recently admitted to hospital with acute illness related to obesity; B1 = 60 years old; B2 = 60 years old, uses wheelchair, receives home care support; B3 = 60 years old, bed-ridden, living in nursing home; C1 = 20 years old; C2 = 20 years old, married with 4 children and only income earner for family; C3 = 20 years old, unmarried, receives social assistance; D = donated \$5 million to the hospital foundation; SD = standard deviation.

\*Answer scale: 0 = very far behind you, 1 = a little bit behind you, 2 = your place, 3 = a little bit ahead of you, 4 = very far ahead of you.

†Wilcoxon-Kruskal-Wallis test.
